# Supplementary material
Source: PubMed Central journal article supplement (PMC7013268)

**Supplementary Table 1: Key Diagnostic information and prior treatment lines**

| Key diagnostic Information (15/3/2017)       | <ul style="list-style-type: none"> <li>• Baseline full blood count: Hb 137 g/L, WCC 46 x 10<sup>9</sup>/L, Lymphocyte count 43 x 10<sup>9</sup>/L, Platelets 147 x 10<sup>9</sup>/L</li> <li>• Morphology: small to medium size lymphocytes with intensely basophilic cytoplasm, nucleoli and characteristic cytoplasmic blebbing</li> <li>• Immunophenotyping: dominant CD8 positive lymphocytic population positive for: CD2, CD3, CD5, CD7 (strong), TCR alpha/beta. Negative for CD19, CD4, CD25, CD57, CD56, TCR gamma/delta.</li> <li>• Cytogenetics analysis by fluorescent <i>in situ</i> hybridization: T-cell receptor alpha/delta (<i>TRA/TRD</i>) (chromosome 14q11.2) rearrangement in 57/100 cells; <i>ATM</i> (chromosome 11q22.3) deletion in 189/200 cells)</li> </ul> |                                                                       |            |            |                 |              |                                            |                                            |                                                                        |                                                       |
|----------------------------------------------|-----------------------------------------------------------------------------------------------------------------------------------------------------------------------------------------------------------------------------------------------------------------------------------------------------------------------------------------------------------------------------------------------------------------------------------------------------------------------------------------------------------------------------------------------------------------------------------------------------------------------------------------------------------------------------------------------------------------------------------------------------------------------------------------|-----------------------------------------------------------------------|------------|------------|-----------------|--------------|--------------------------------------------|--------------------------------------------|------------------------------------------------------------------------|-------------------------------------------------------|
| Chemotherapy regimen                         | Dose                                                                                                                                                                                                                                                                                                                                                                                                                                                                                                                                                                                                                                                                                                                                                                                    | Frequency                                                             | Start date | End date   | Duration (days) | Total cycles | Initial FBC (10 <sup>9</sup> /L)           | Best response FBC (10 <sup>9</sup> /L)     | Best ORR                                                               | Toxicities (Grade 3+)                                 |
| Alemtuzumab IV                               | 30 mg                                                                                                                                                                                                                                                                                                                                                                                                                                                                                                                                                                                                                                                                                                                                                                                   | three times a week                                                    | 26/07/2017 | 10/10/2017 | 76              | 11           | Hb 125 g/L<br>WCC 64<br>Lymph 51<br>Plt 21 | Hb 86 g/L<br>WCC 89<br>Lymph 86<br>Plt 19  | refractory disease                                                     | N/A                                                   |
| Alemtuzumab IV                               | 30 mg                                                                                                                                                                                                                                                                                                                                                                                                                                                                                                                                                                                                                                                                                                                                                                                   | five times a week                                                     | 11/10/2017 | 17/11/2017 | 37              | 5            | Hb 106 g/L<br>WCC 99<br>Lymph 95<br>Plt 50 | Hb 87 g/L<br>WCC 81<br>Lymph 78<br>Plt 21  | refractory disease                                                     | N/A                                                   |
| Pentostatin*                                 | 4 mg/m <sup>2</sup>                                                                                                                                                                                                                                                                                                                                                                                                                                                                                                                                                                                                                                                                                                                                                                     | every 14 days                                                         | 24/11/2017 | 16/02/2018 | 84              | 6            | Hb 99 g/L<br>WCC 86<br>Lymph 8<br>Plt 46   | Hb 105 g/L<br>WCC 71<br>Lymph 68<br>Plt 73 | refractory disease                                                     | N/A                                                   |
| Fludarabine<br>Mitoxantrone<br>Dexamethasone | 25 mg/m <sup>2</sup><br>12 mg/m <sup>2</sup><br>20 mg                                                                                                                                                                                                                                                                                                                                                                                                                                                                                                                                                                                                                                                                                                                                   | day 1-3 every 4 weeks<br>day 1 every 4 weeks<br>day 1-5 every 4 weeks | 24/03/2018 | 09/05/2018 | 46              | 2            | Hb 88 g/L<br>WCC 81<br>Lymph 80<br>Plt 9   | Hb 78 g/L<br>WCC 53<br>Lymph 49<br>Plt 12  | refractory disease                                                     | febrile neutropenia-grade 3                           |
| Venetoclax                                   | 20 mg escalated to 800 mg                                                                                                                                                                                                                                                                                                                                                                                                                                                                                                                                                                                                                                                                                                                                                               | Daily                                                                 | 10/05/2018 | 28/08/2018 | 111             | N/A          | Hb 69 g/L<br>WCC 60<br>Lymph 61<br>Plt 6   | Hb 87 g/L<br>WCC 22<br>Lymph 21<br>Plt 3   | Minor WCC response in peripheral blood<br>Refractory disease otherwise | Grade 2 diarrhea and Grade 4 neutropenia at 800 mg od |

Abbreviations: FBC full blood count; Hb: haemoglobin, WCC: white cell count; Plt: platelet count; Lymph: lymphocyte count; ORR: overall response rate; IV: intravenous; mg: milligrams

**Supplementary Table 2: Full blood count during venetoclax dose escalation phase**

| <b>Venetoclax Dose</b> | <b>Day</b>     | <b>Hemoglobin (g/L)</b> | <b>White cell count (WCC) (10<sup>9</sup>/L)</b> | <b>Platelet count (10<sup>9</sup>/L)</b> |
|------------------------|----------------|-------------------------|--------------------------------------------------|------------------------------------------|
| 20 mg o.d.             | 1              | 69                      | 61.36                                            | 6                                        |
| 50 mg o.d.             | 5              | 76                      | 122.22                                           | 7                                        |
| 100 mg o.d.            | 8              | 84                      | 147.67                                           | 7                                        |
| 200 mg o.d.            | 12             | 88                      | 117.81                                           | 6                                        |
| 400 mg o.d.            | 15             | 95                      | 99.16                                            | 6                                        |
| 600 mg o.d.            | 20             | 81                      | 97.07                                            | 5                                        |
| 800 mg o.d.            | 29             | 89                      | 45.38                                            | 4                                        |
| 800 mg o.d.            | 39 (WCC nadir) | 87                      | 22.47                                            | 3                                        |

**Supplementary Figure 1. In Vitro sensitivity to BH3 mimetics in T-PLL patient samples.**

PBMCs isolated from 10 T-PLL patients were incubated with different concentrations of venetoclax (A,B) , S63845 (C,D) or A1331852 (E,F) with and without stimulation by IL-2, IL-4 and CD40L for 24h before analysis of cell viability using CellTiterGlo. Experiments were performed in triplicate and data shown are mean. (G) Calculated EC50 for each sample.

**Supplementary Figure 2. Synergistic interaction between BCL2 and MCL1 inhibition in unstimulated samples.**

(A-J) Cells isolated from 10 T-PLL patients were treated with different concentrations of venetoclax and S63845 in combination without cytokine stimulation for 24h before analysis of cell viability using CellTiterGlo. Experiments were performed in triplicate and data shown are mean. Combination index (CI) values < 1 indicate synergy.

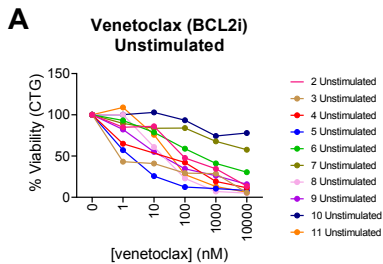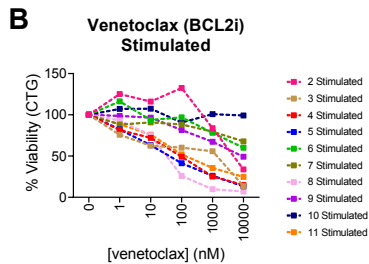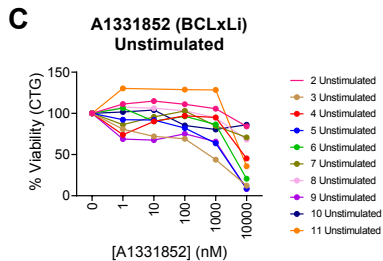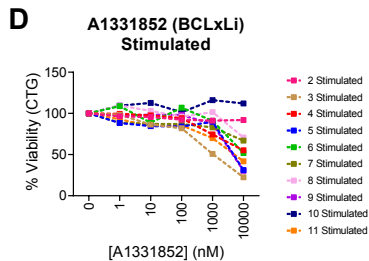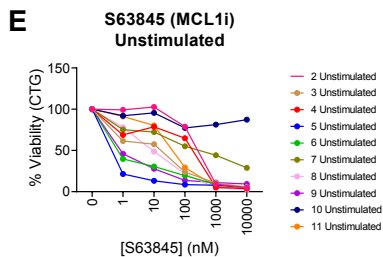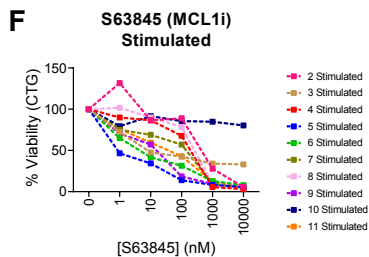

**G**

|    | EC50 (nM)    |            |              |            |              |            |
|----|--------------|------------|--------------|------------|--------------|------------|
|    | venetoclax   |            | A1331852     |            | S63845       |            |
|    | Unstimulated | Stimulated | Unstimulated | Stimulated | Unstimulated | Stimulated |
| 2  | 159.50       | 5540.00    | >10,000      | 13.42      | 231.80       | 475.80     |
| 3  | <1           | 232.60     | 2874.00      | 1323.00    | 7.53         | 32.97      |
| 4  | 13.20        | 83.91      | 7204.00      | 981.70     | 87.71        | 163.70     |
| 5  | 1.47         | 47.69      | >10,000      | >10,000    | <1           | 0.79       |
| 6  | 453.90       | >10,000    | >10,000      | 1504.00    | <1           | 5.44       |
| 7  | 45030.00     | >10,000    | 1037.00      | >10,000    | 286.60       | 54.73      |
| 8  | 21.09        | 33.58      | 3660.00      | >10,000    | 9.31         | 238.60     |
| 9  | 28.87        | 7979.00    | 1581.00      | 3044.00    | <1           | 9.72       |
| 10 | >10,000      | >10,000    | 64.65        | >10,000    | >10,000      | >10,000    |
| 11 | 39.18        | 206.80     | >10,000      | >10,000    | 40.56        | 25.41      |

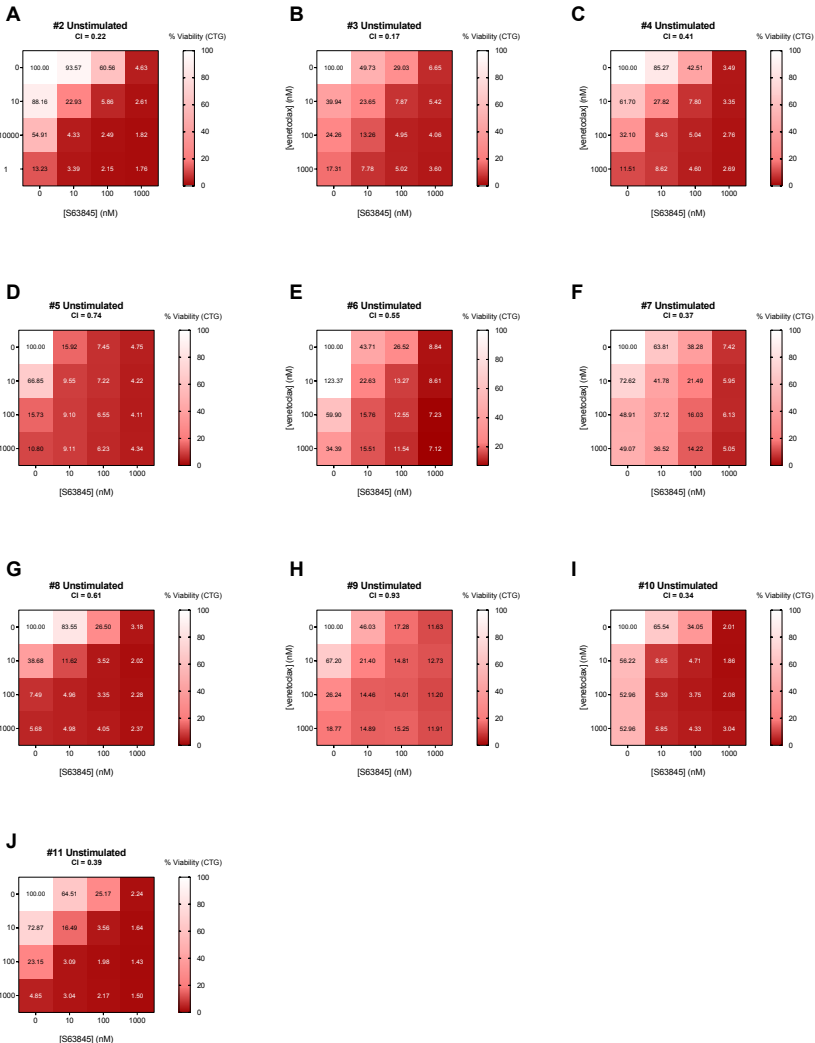

Supplement: baADV2019000917-suppl1.pdf [file baADV2019000917-suppl1.pdf]
